# Supplementary material
Source: MDPI journal article supplement (https://www.mdpi.com/2311-5629/8/3/45)
Supplement: s1 [file s1]

Archive with 1 entries (1 files):
- carbon-1889355-supplementary.pdf
